# Supplementary material
Source: Research Square preprint supplement (doi:10.21203/rs.3.rs-9293073/v1)
Supplement: Supplementary file 1 [file f9bf6f17aba182e061f1c017.docx]

**Supplementary Materials**


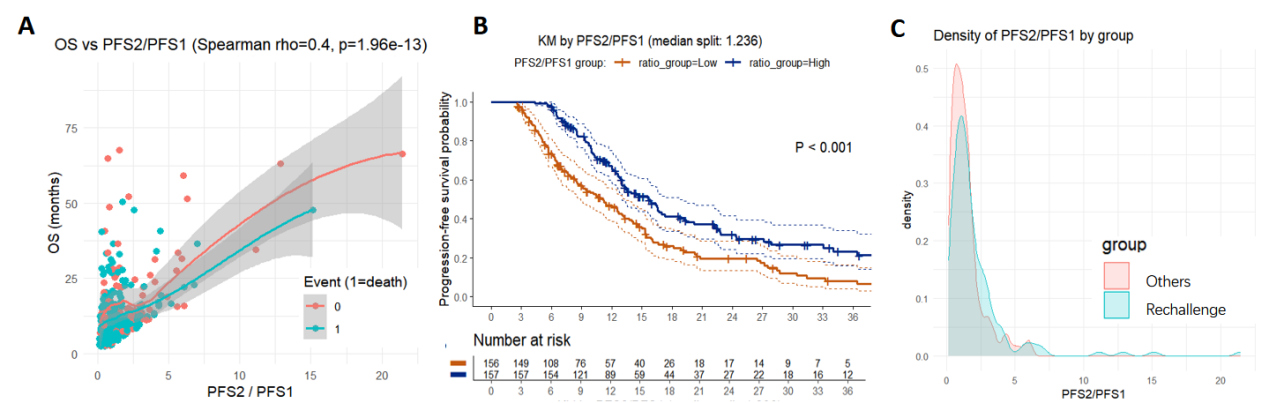

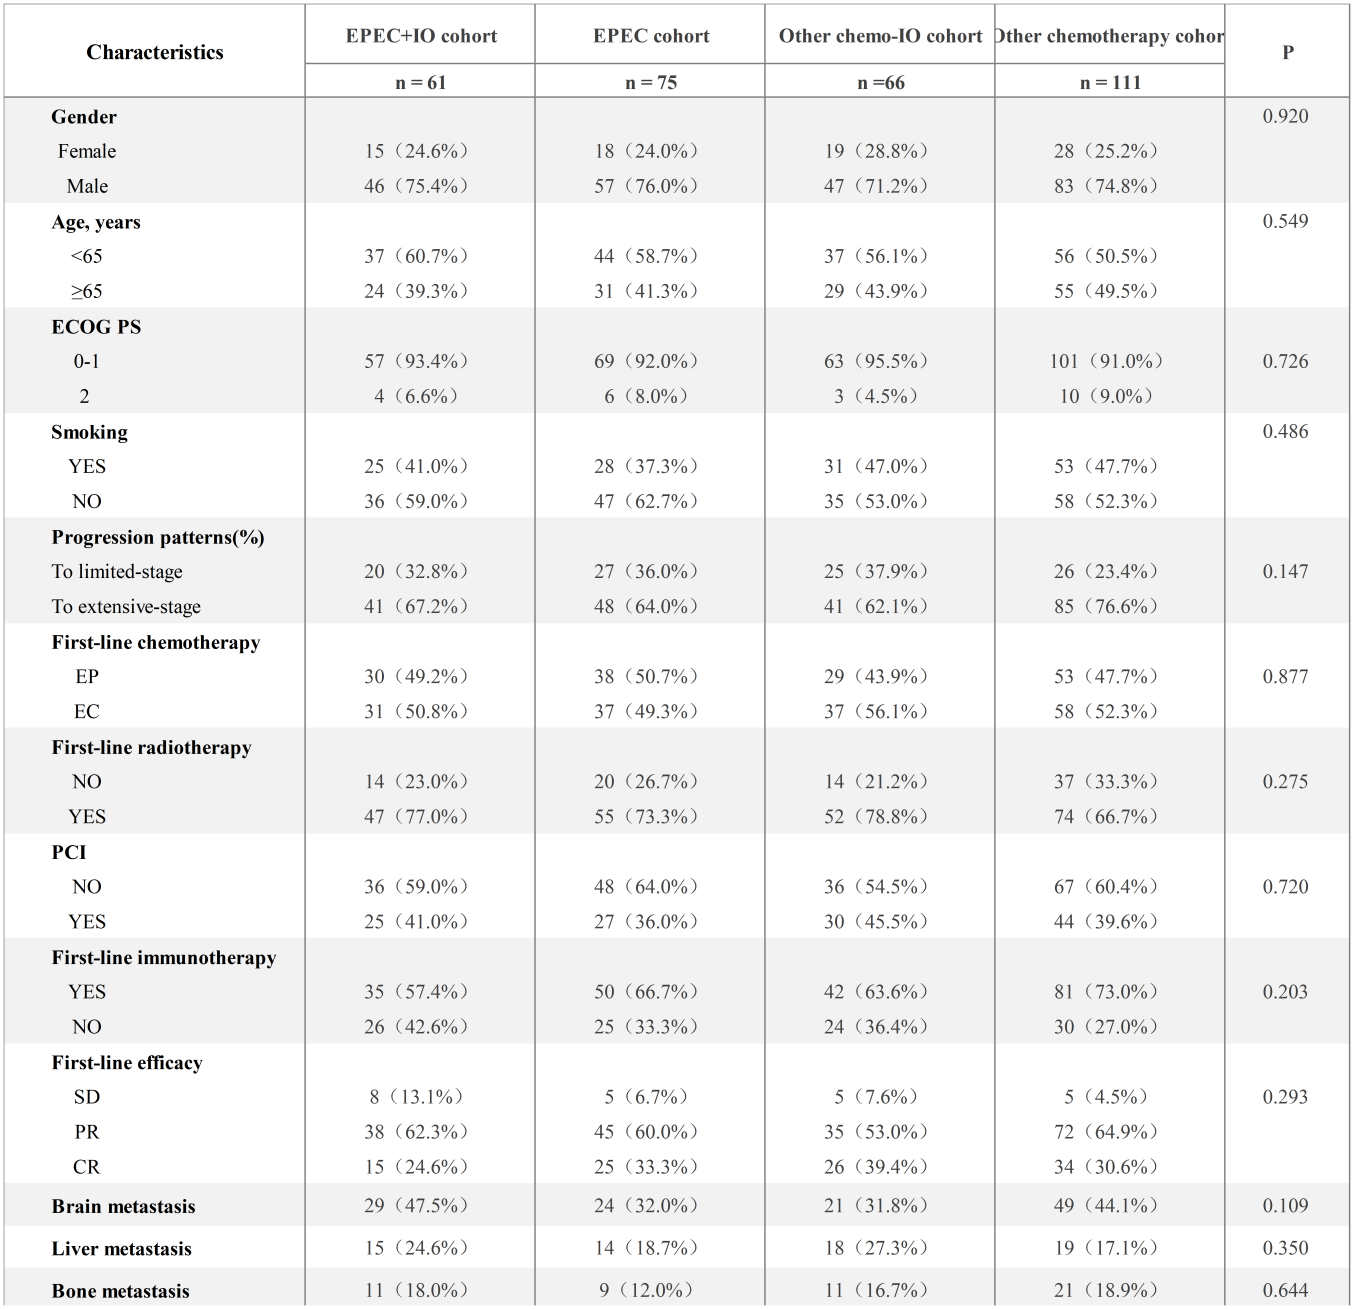
**Supplementary Figure 1** Baseline and therapeutic characteristics of subgroups. ECOG PS Eastern Cooperative Oncology Group performance status, CR complete response, PR partial response, TFI therapy-free interval, PCI prophylactic cranial irradiation.

**Supplementary Figure 2** Associations of PFS2/PFS1 with treatment strategies and response. (A) Correlation between PFS2/PFS1 and overall survival. (B) Survival comparison stratified by median PFS2/PFS1. (C) Distribution of PFS2/PFS1 across rechallenge and non-rechallenge cohorts.


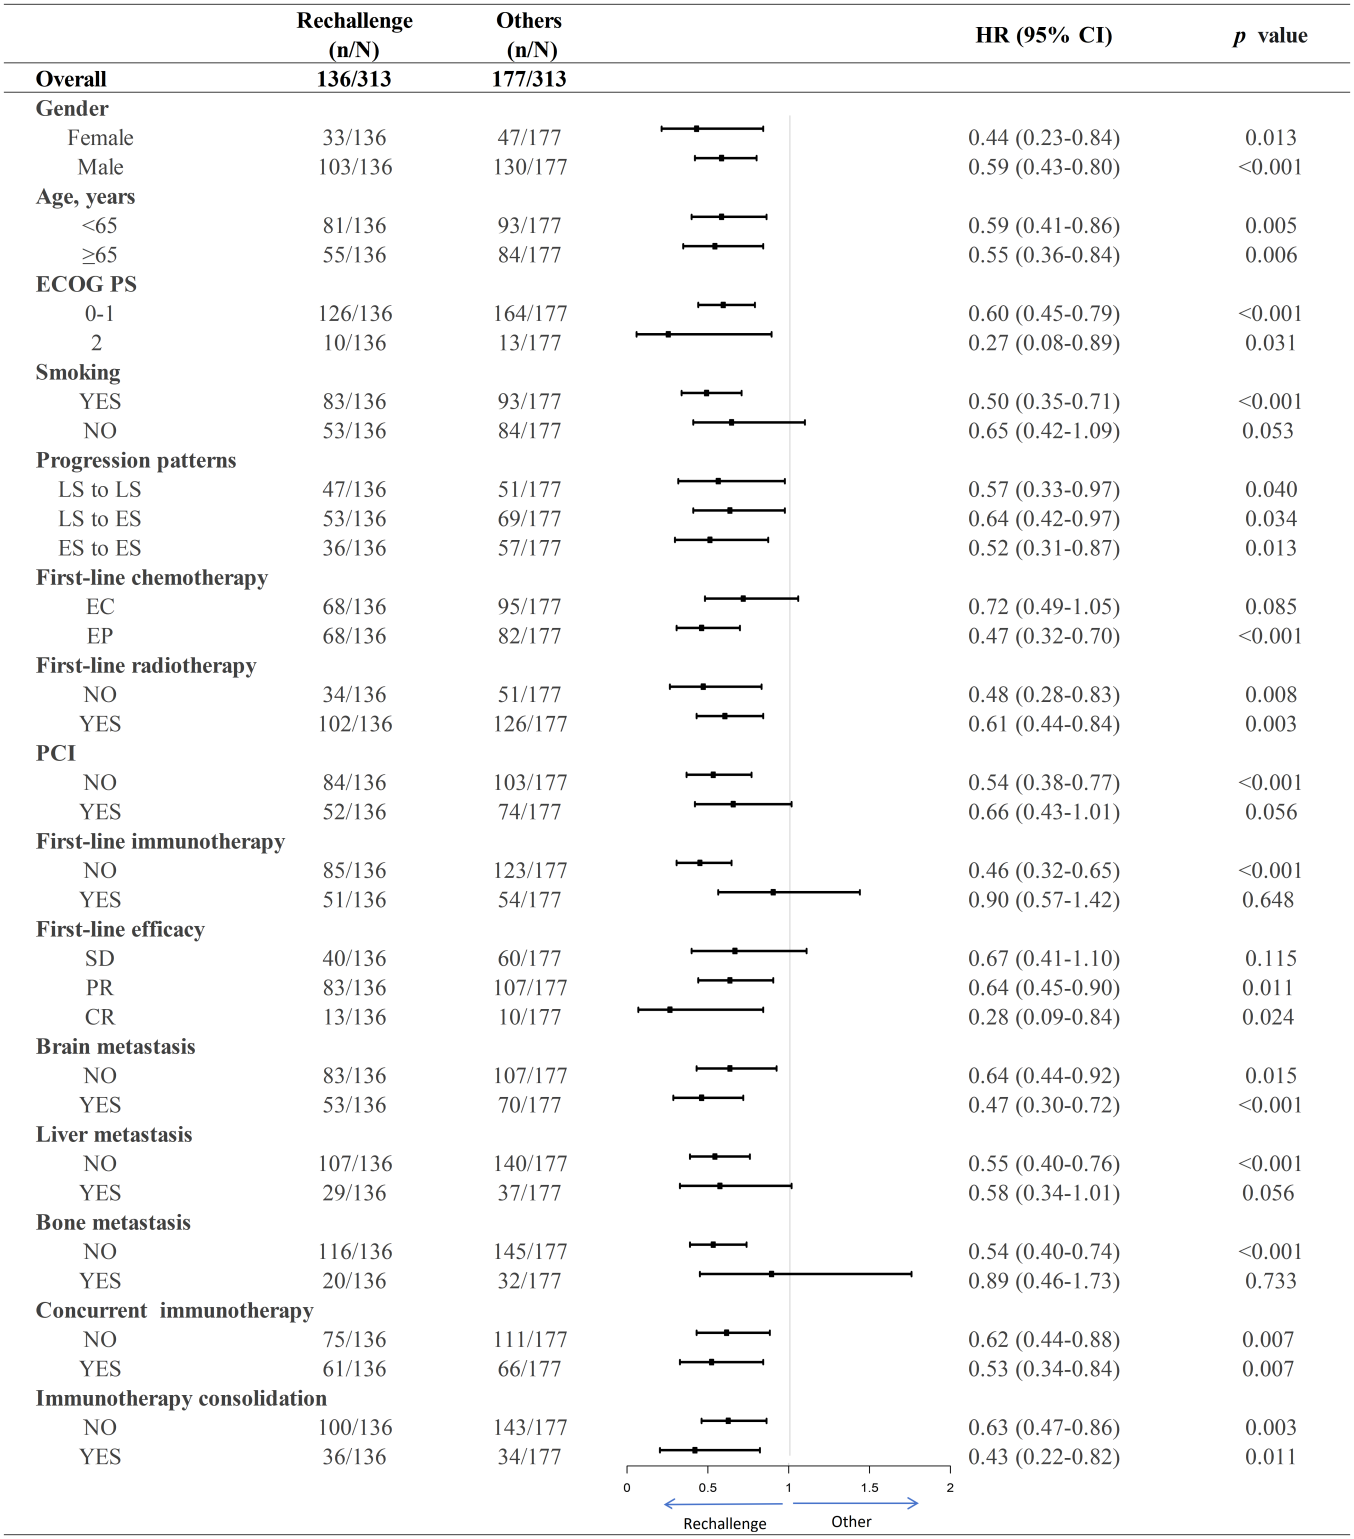


**Supplementary Figure 3** Exploratory subgroup analysis of OS in the rechallenge and other-treatment cohorts. ECOG PS Eastern Cooperative Oncology Group performance status, CR complete response, PR partial response, TFI therapy-free interval, PCI prophylactic cranial irradiation


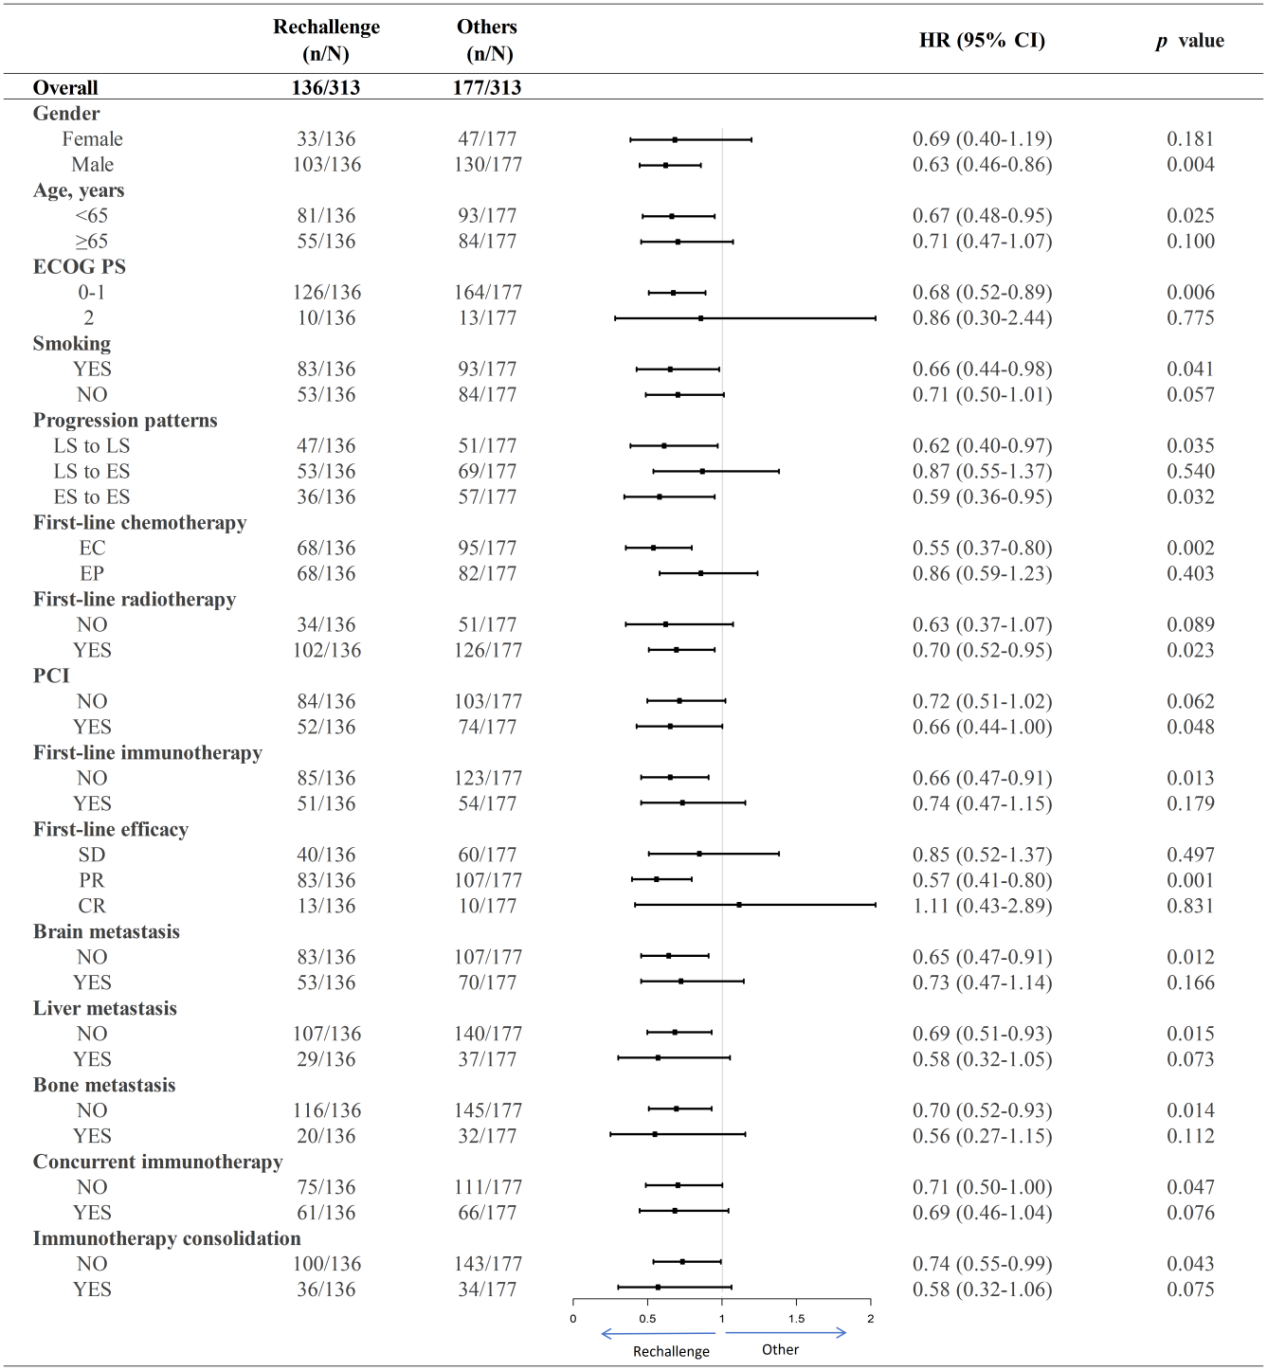


**Supplementary Figure 4** Exploratory subgroup analysis of PFS in the rechallenge and other-treatment cohorts. ECOG PS Eastern Cooperative Oncology Group performance status, CR complete response, PR partial response, TFI therapy-free interval, PCI prophylactic cranial irradiation


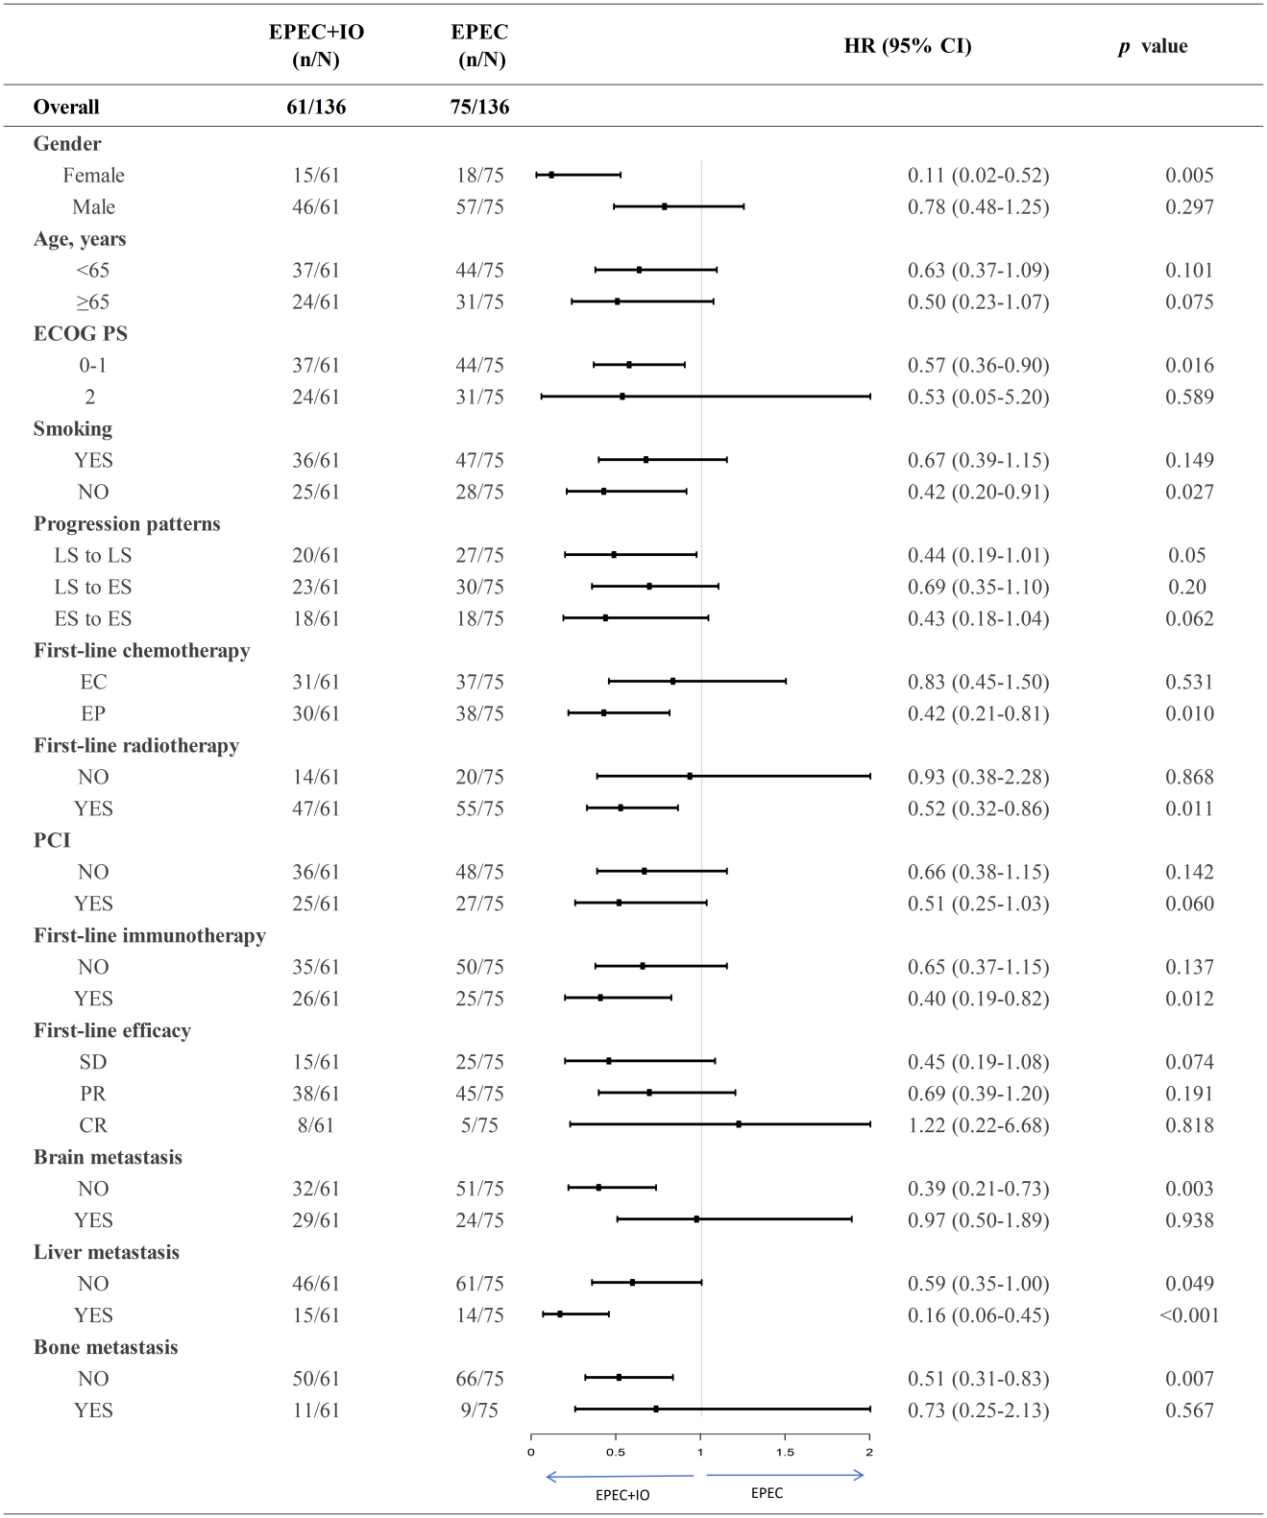


**Supplementary Figure 5** Exploratory subgroup analysis of OS in the EPEC+IO rechallenge and EPEC cohorts. ECOG PS Eastern Cooperative Oncology Group performance status, CR complete response, PR partial response, TFI therapy-free interval, PCI prophylactic cranial irradiation


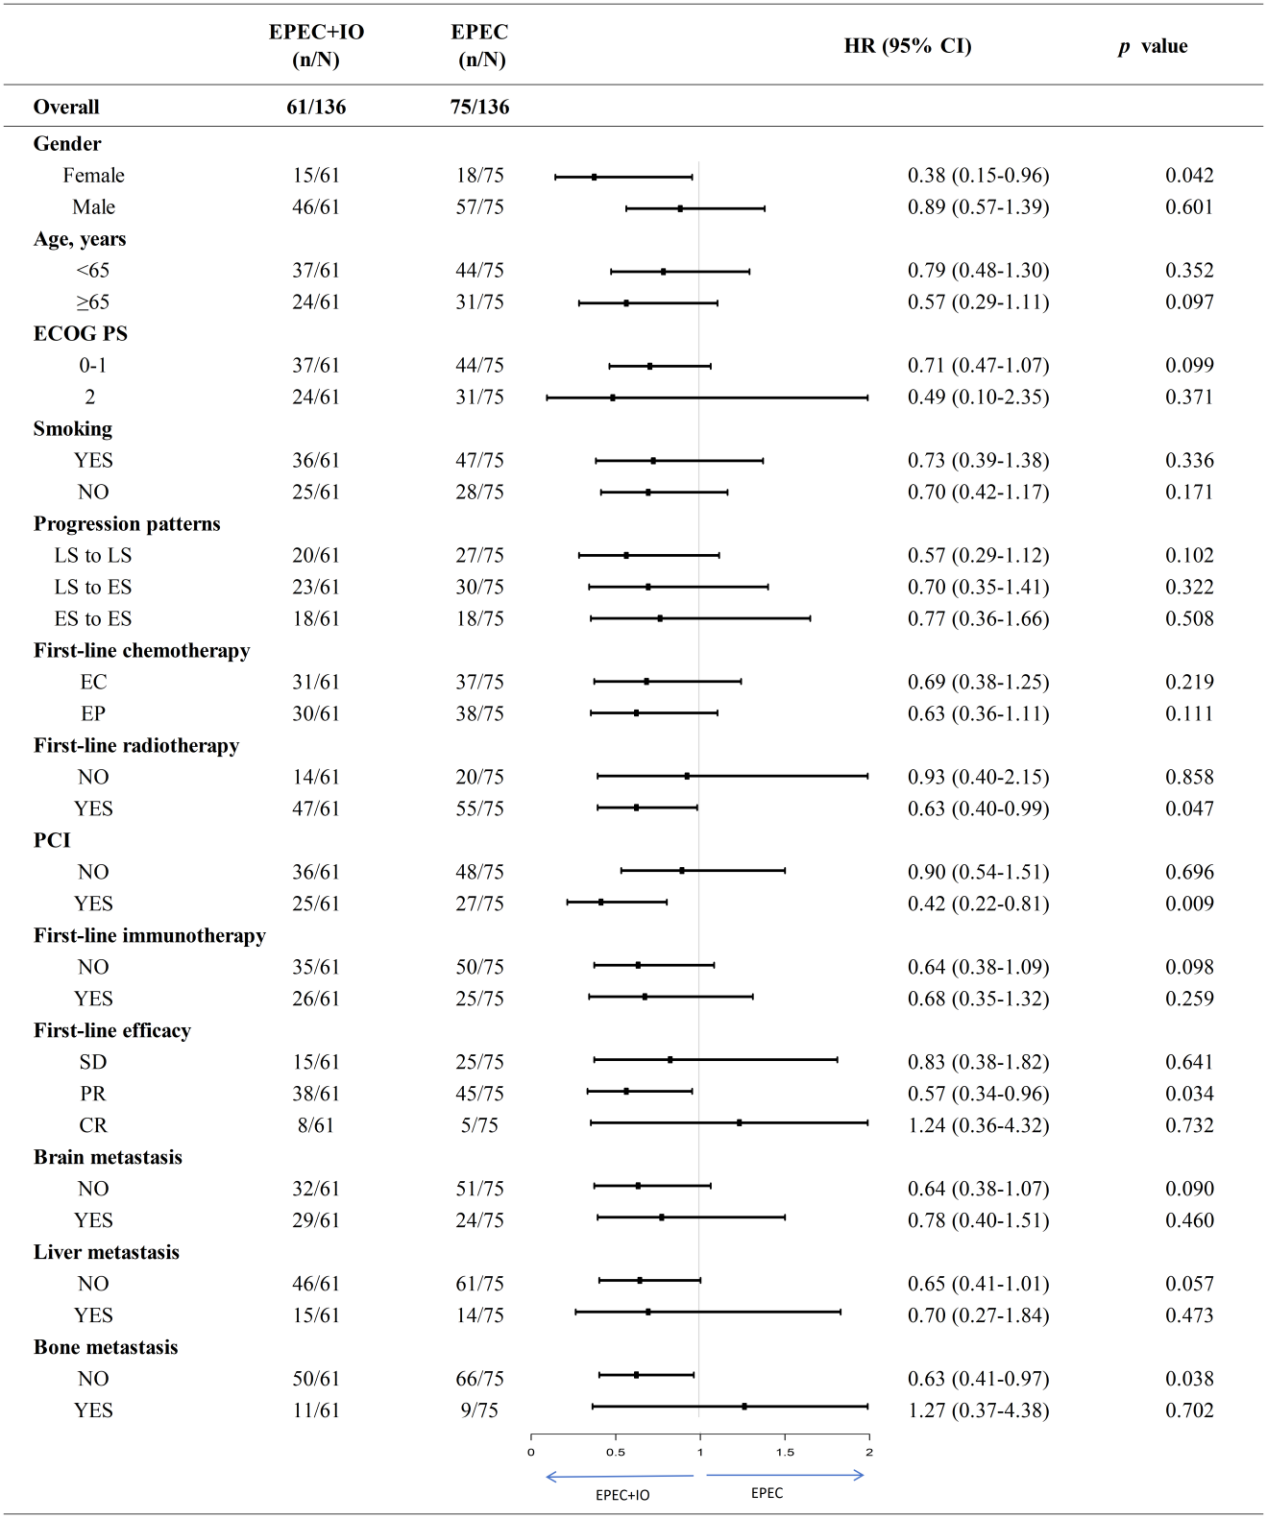
**Supplementary Figure 6** Exploratory subgroup analysis of PFS in the EPEC+IO rechallenge and EPEC cohorts. ECOG PS Eastern Cooperative Oncology Group performance status, CR complete response, PR partial response, TFI therapy-free interval, PCI prophylactic cranial irradiation


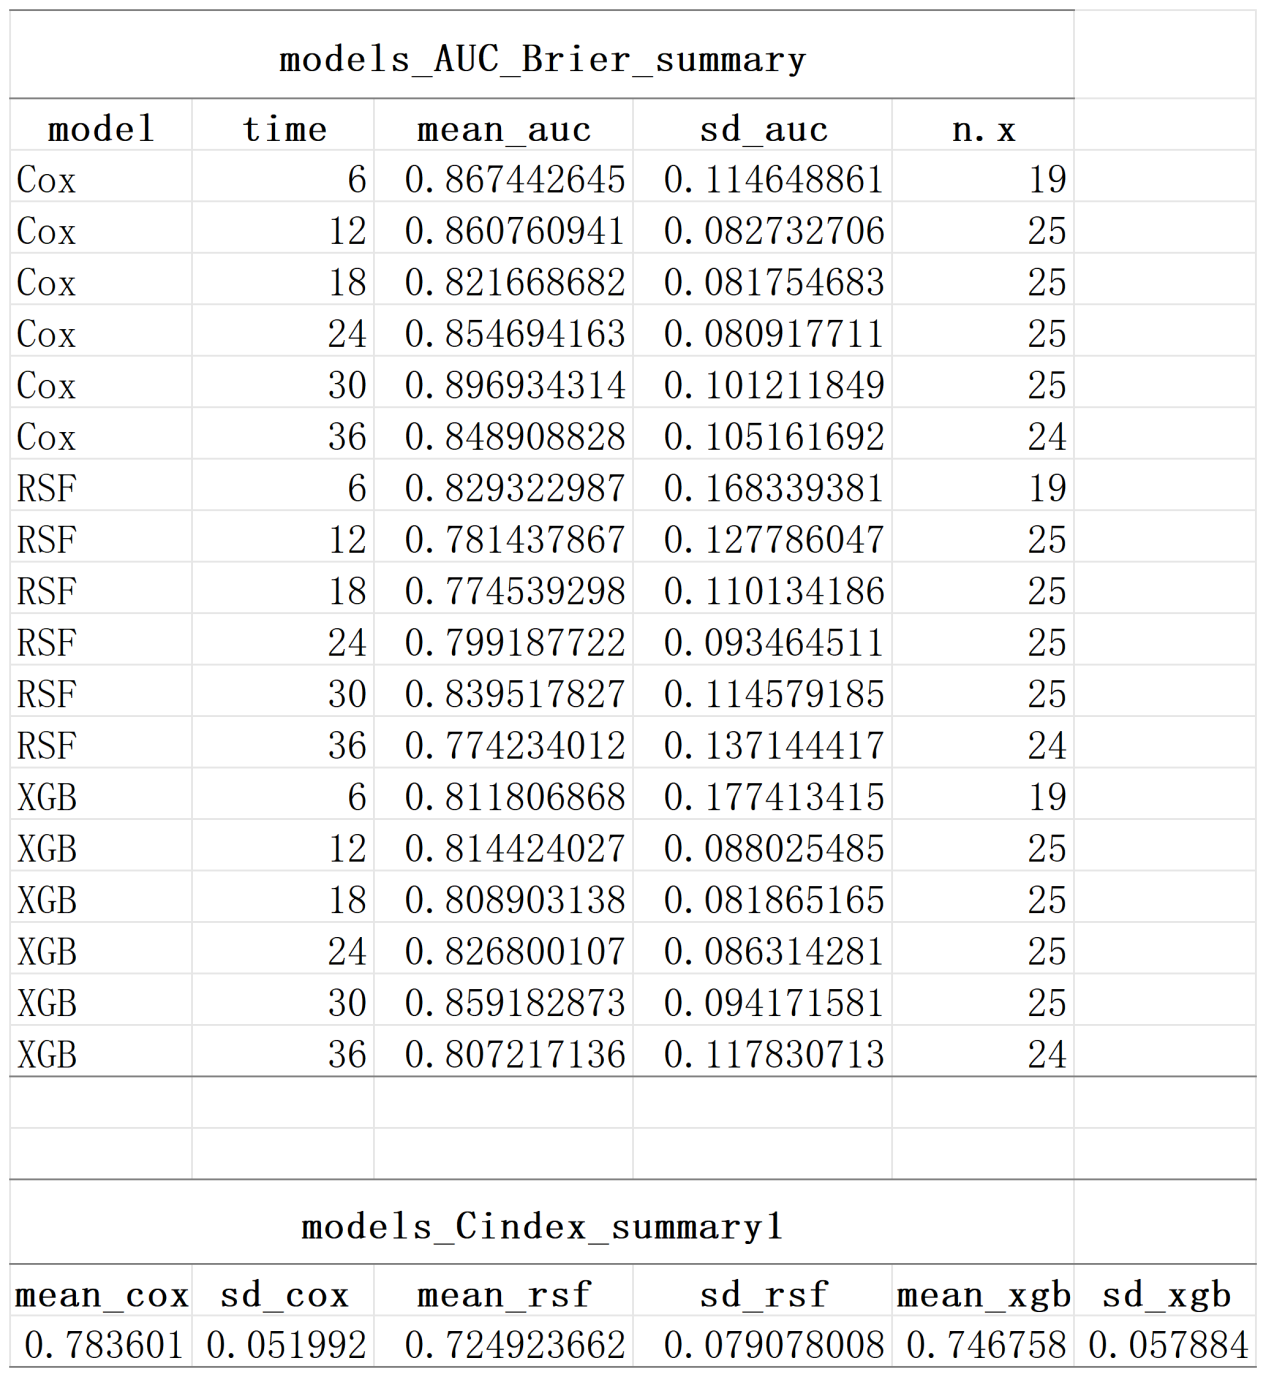


**Supplementary Figure 7** Predictive performance of each algorithm, summarized by the area under the receiver operating characteristic curve (AUC) and the concordance index (C-index).
